# Supplementary material for: Leveraging Dissolution by Autoinjector Designs
Source: MDPI journal article supplement (doi:10.3390/pharmaceutics14112544), 2022-11-21
Supplement: s1 [file s1]

**Table S1.** Conditions of multi-dose dissolution experiments and their respective dissolution times (given as mean  $\pm$  standard deviation;  $n = 3$ ).

| Particle Size<br>[ $\mu\text{m}$ ] | Rotor Speed<br>[rpm] | Solvent      | Temperature<br>[°C] | Dissolution Time<br>[s] |
|------------------------------------|----------------------|--------------|---------------------|-------------------------|
| <160                               | 150                  | Water        | 5                   | 38.31 ( $\pm 4.77$ )    |
| <160                               | 150                  | Water        | 45                  | 40.18 ( $\pm 0.56$ )    |
| <160                               | 150                  | 45% Glycerol | 5                   | 22.20 ( $\pm 2.53$ )    |
| <160                               | 150                  | 45% Glycerol | 45                  | 41.40 ( $\pm 6.75$ )    |
| <160                               | 300                  | Water        | 5                   | 7.01 ( $\pm 2.20$ )     |
| <160                               | 300                  | Water        | 45                  | 6.31 ( $\pm 2.56$ )     |
| <160                               | 300                  | 45% Glycerol | 5                   | 18.88 ( $\pm 1.87$ )    |
| <160                               | 300                  | 45% Glycerol | 45                  | 14.87 ( $\pm 4.36$ )    |
| 250–500                            | 150                  | Water        | 5                   | 26.74 ( $\pm 3.16$ )    |
| 250–500                            | 150                  | Water        | 45                  | 37.51 ( $\pm 7.75$ )    |
| 250–500                            | 150                  | 45% Glycerol | 5                   | 51.18 ( $\pm 1.89$ )    |
| 250–500                            | 150                  | 45% Glycerol | 45                  | 44.71 ( $\pm 2.21$ )    |
| 250–500                            | 300                  | Water        | 5                   | 10.90 ( $\pm 2.70$ )    |
| 250–500                            | 300                  | Water        | 45                  | 8.12 ( $\pm 0.70$ )     |
| 250–500                            | 300                  | 45% Glycerol | 5                   | 44.88 ( $\pm 2.89$ )    |
| 250–500                            | 300                  | 45% Glycerol | 45                  | 35.26 ( $\pm 1.10$ )    |
| <160                               | 225                  | 25% Glycerol | 25                  | 25.01 ( $\pm 2.68$ )    |
| 250–500                            | 225                  | 25% Glycerol | 25                  | 29.78 ( $\pm 0.55$ )    |
| 160–250                            | 150                  | 25% Glycerol | 25                  | 26.58 ( $\pm 13.96$ )   |
| 160–250                            | 300                  | 25% Glycerol | 25                  | 8.24 ( $\pm 0.26$ )     |
| 160–250                            | 225                  | Water        | 25                  | 16.93 ( $\pm 5.29$ )    |
| 160–250                            | 225                  | 45% Glycerol | 25                  | 37.94 ( $\pm 2.25$ )    |
| 160–250                            | 225                  | 25% Glycerol | 5                   | 36.57 ( $\pm 5.78$ )    |
| 160–250                            | 225                  | 25% Glycerol | 45                  | 24.45 ( $\pm 7.74$ )    |
| 160–250                            | 225                  | 25% Glycerol | 25                  | 25.23 ( $\pm 7.74$ )    |

**Table S2.** Analysis of Variance of the significant factors with regard to dissolution time.

| Source                   | DF | Seq SS  | Contribution [%] | Adj. SS | F-Value |
|--------------------------|----|---------|------------------|---------|---------|
| Model                    | 5  | 10683.8 | 82.62            | 10683.8 | 61.79   |
| <b>Linear</b>            | 3  | 8231.5  | 63.65            | 7981.6  | 76.94   |
| Particle Size            | 1  | 1121.0  | 8.67             | 1066.9  | 30.85   |
| Rotor Speed              | 1  | 5087.6  | 39.34            | 4992.7  | 144.38  |
| Glycerol                 | 1  | 2022.8  | 15.64            | 1889.8  | 54.65   |
| <b>2-way Interaction</b> | 2  | 2452.3  | 18.96            | 2452.3  | 35.46   |
| Particle Size * Glycerol | 1  | 1535.5  | 11.87            | 1589.6  | 45.97   |
| Rotor Speed * Glycerol   | 1  | 916.8   | 7.09             | 916.8   | 26.51   |
| Error                    | 65 | 2247.7  | 17.38            | 2247.7  |         |
| Total                    | 70 | 12931.5 | 100.0            |         |         |

**Table S3.** Conditions of multi-dose dissolution experiments in sodium CMC at 25 °C and their respective dissolution times (given as mean  $\pm$  standard deviation;  $n = 3$ ).

| Particle size [ $\mu\text{m}$ ] | Rotor Speed [rpm] | Dissolution time [s] |
|---------------------------------|-------------------|----------------------|
| <160                            | 150               | 34.62 ( $\pm 1.78$ ) |
| <160                            | 225               | 33.23 ( $\pm 3.77$ ) |
| <160                            | 300               | 3.91 ( $\pm 0.45$ )  |
| 160–250                         | 150               | 34.16 ( $\pm 0.10$ ) |
| 160–250                         | 225               | 23.77 ( $\pm 1.90$ ) |

|         |     |                      |
|---------|-----|----------------------|
| 160–250 | 300 | 7.21 ( $\pm 0.84$ )  |
| 250–500 | 150 | 29.08 ( $\pm 1.42$ ) |
| 250–500 | 225 | 26.50 ( $\pm 3.86$ ) |
| 250–500 | 300 | 13.25 ( $\pm 0.24$ ) |

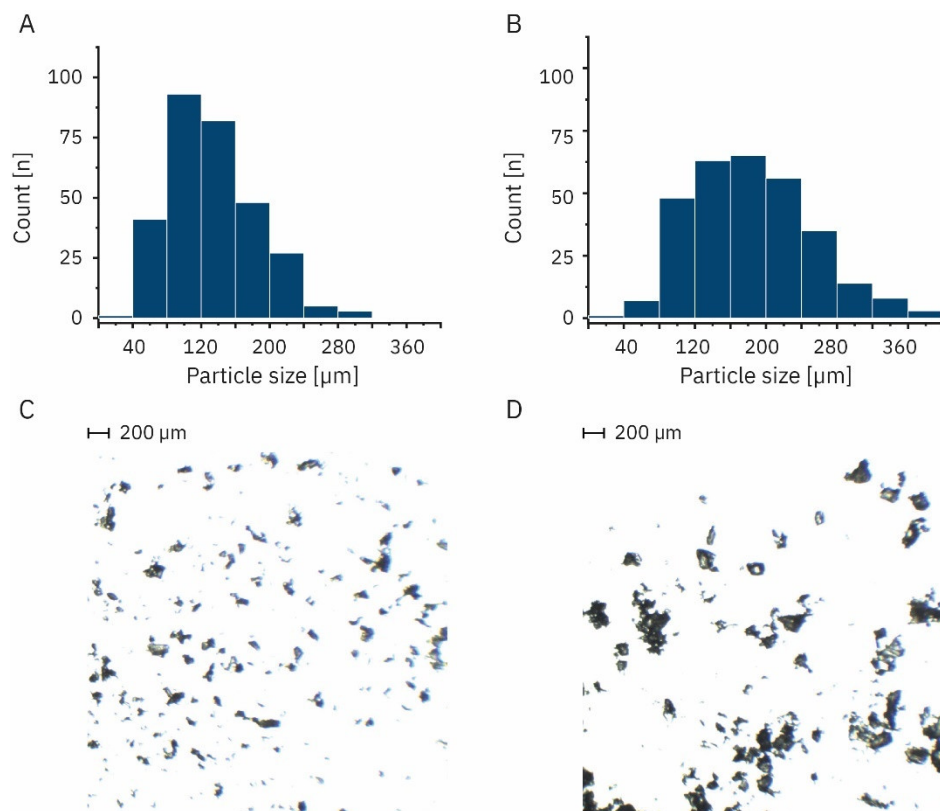

**Figure S1.** Histogram for the particle size distribution of (A) HI-6 dimethyl sulfonate (DMS) and (B) HI-6 dichloride (Cl<sub>2</sub>) with corresponding microscopy images for (C) DMS and (D) Cl<sub>2</sub>. Microscope images were recorded with a Bresser microscope and a Bresser MicroCam (5.0MP) camera at a forty times magnification. Particle sizes were determined with the MicroCamLab software version 7.3.1.8.
